# Supplementary material
Source: PubMed Central journal article supplement (PMC1964858)

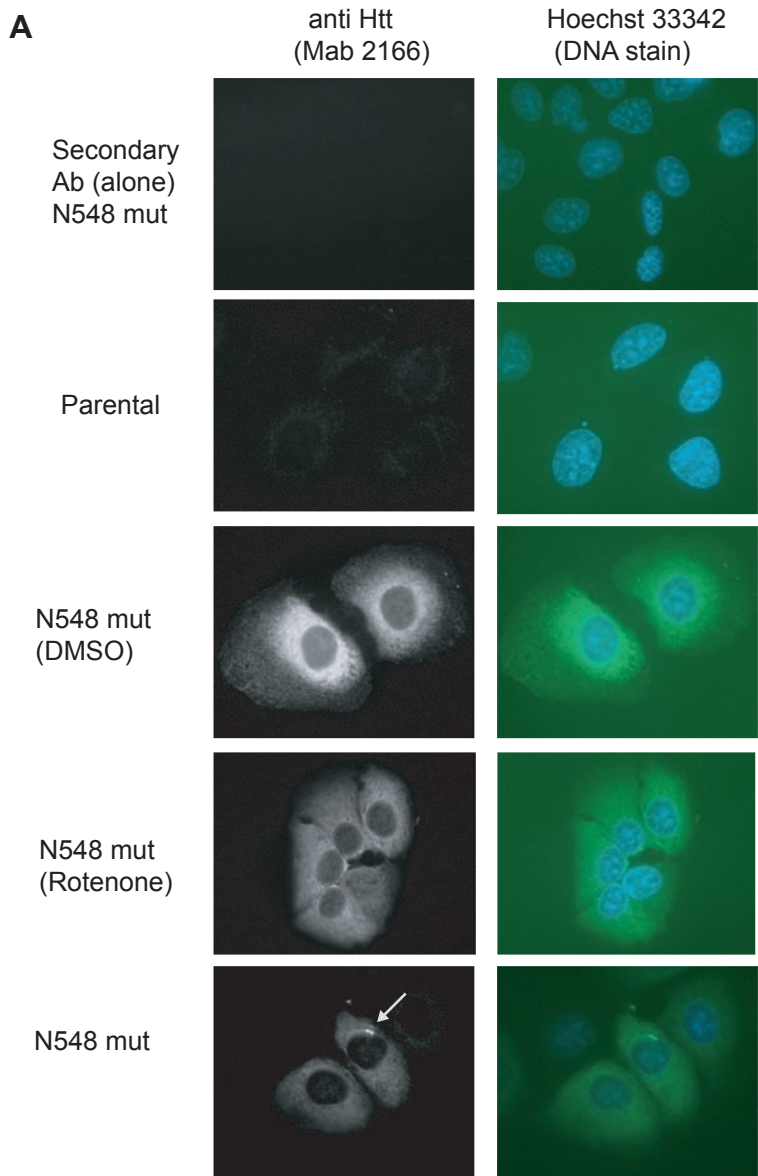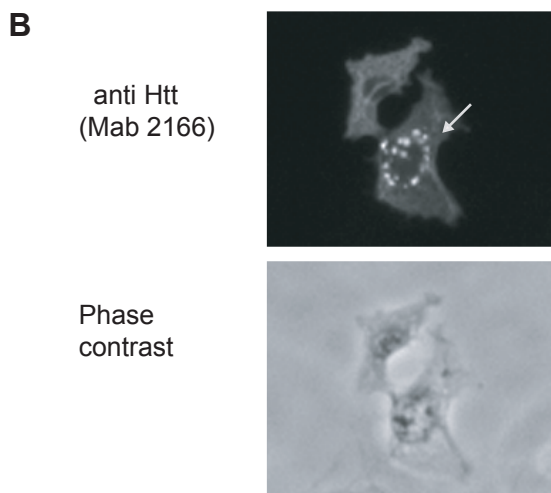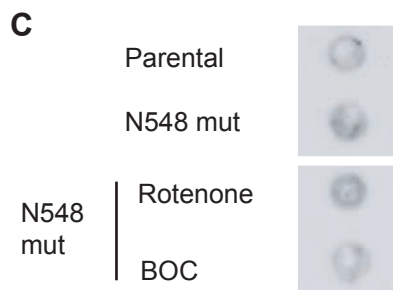

Supplement: pnas_0704482104_1.pdf [file pnas_0704482104_1.pdf]

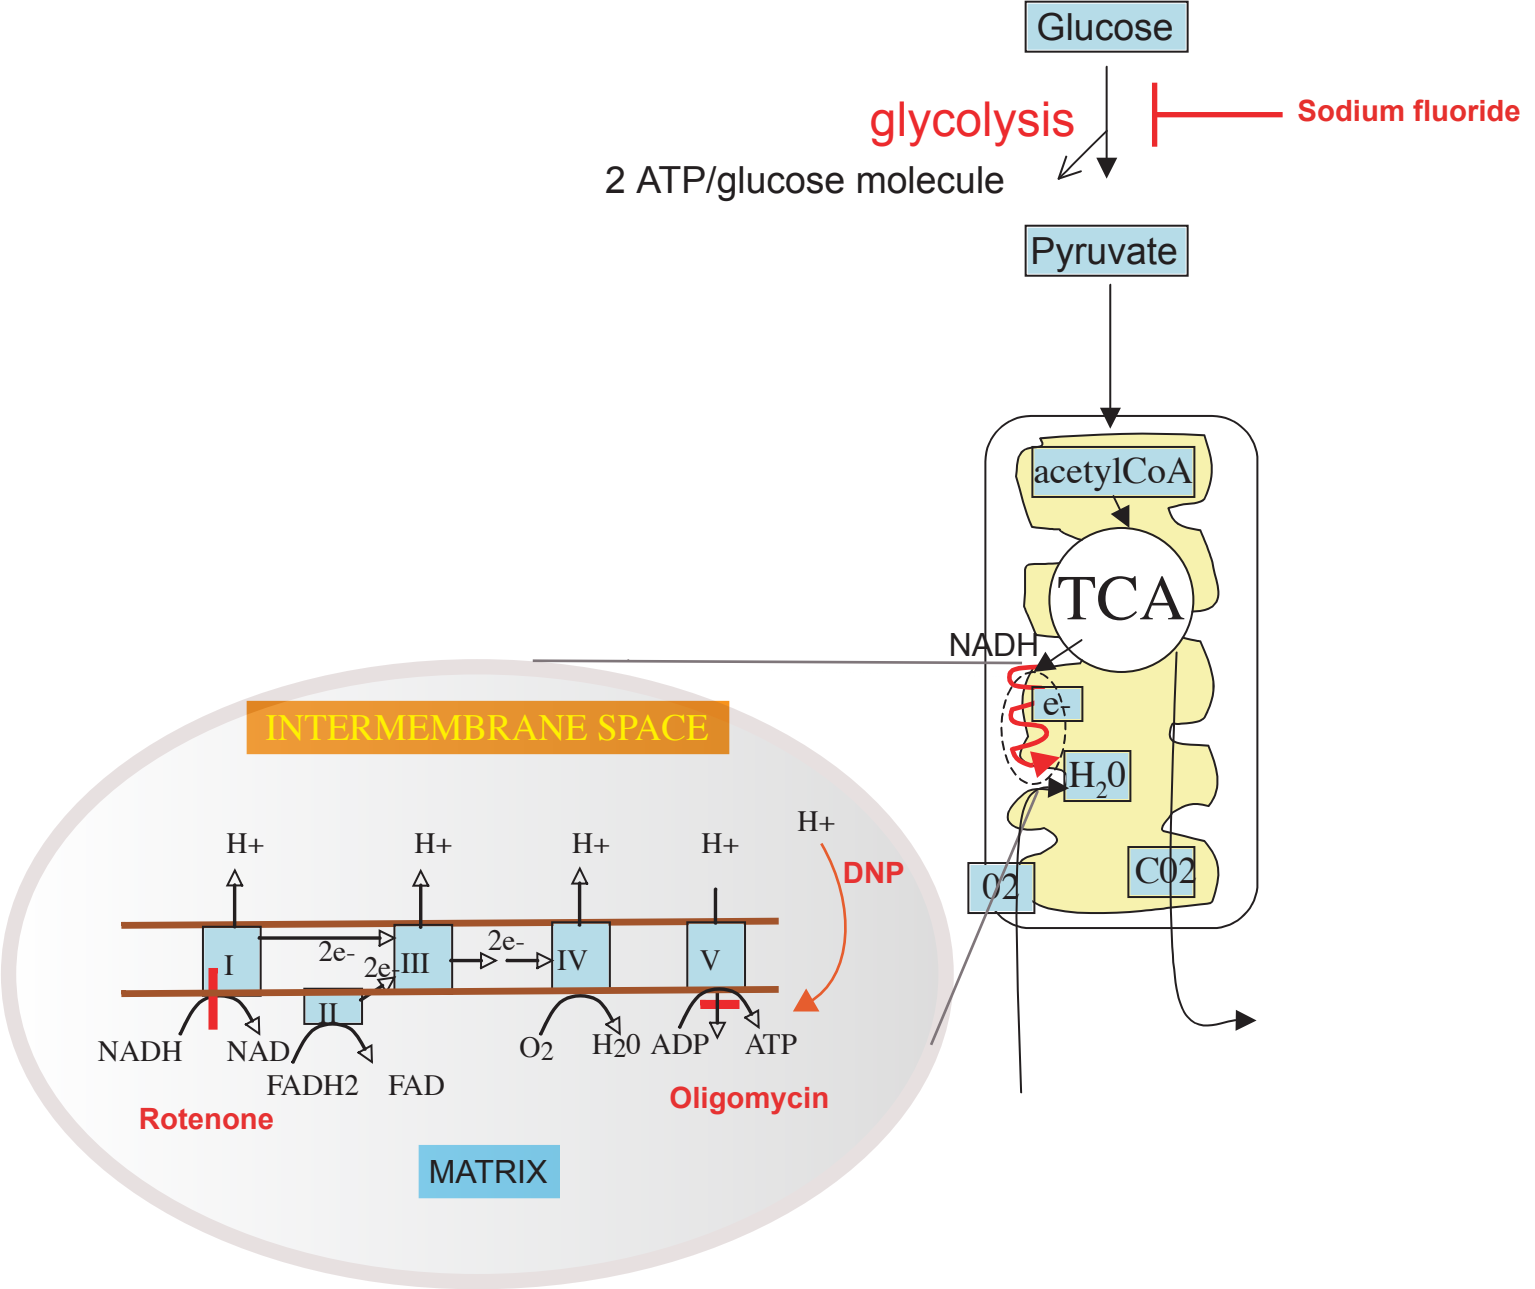

**Electron transport chain**

36 ATP/glucose molecule

Supplement: pnas_0704482104_2.pdf [file pnas_0704482104_2.pdf]

A

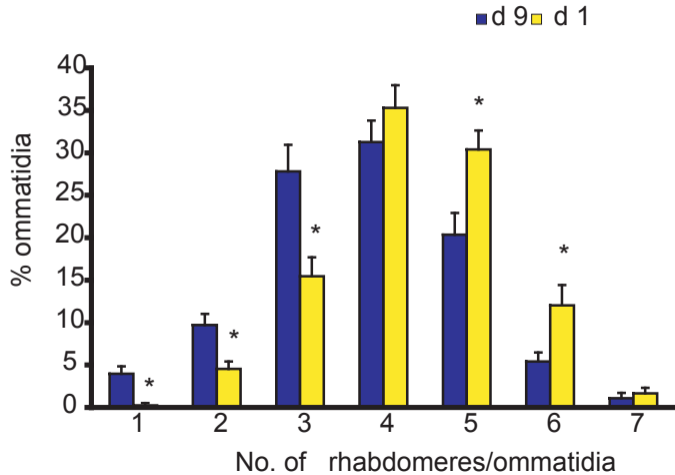

B

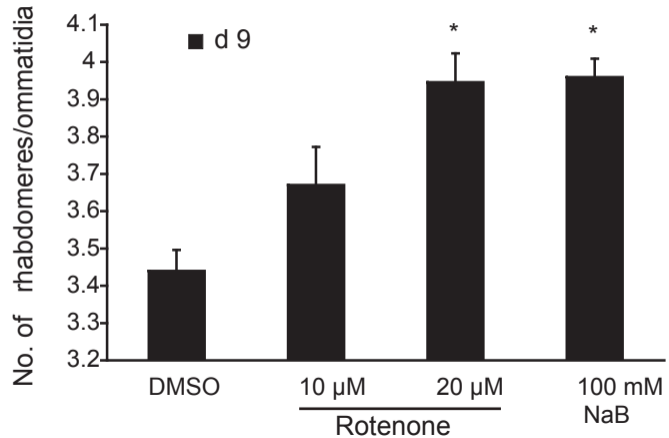

Supplement: pnas_0704482104_3.pdf [file pnas_0704482104_3.pdf]

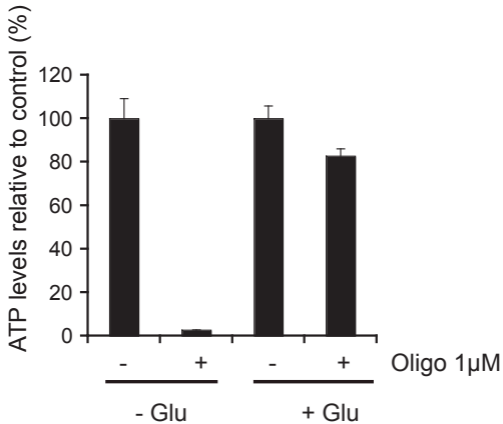

Supplement: pnas_0704482104_4.pdf [file pnas_0704482104_4.pdf]

A

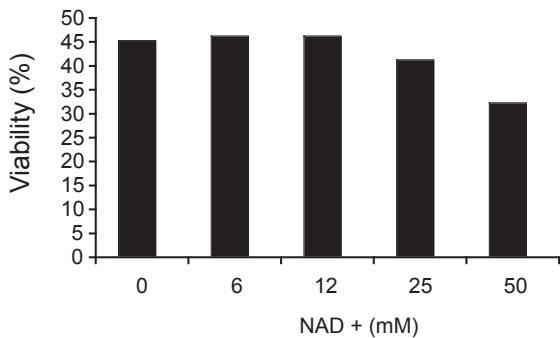

B

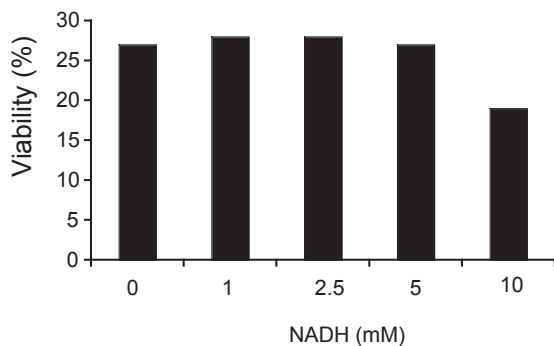

C

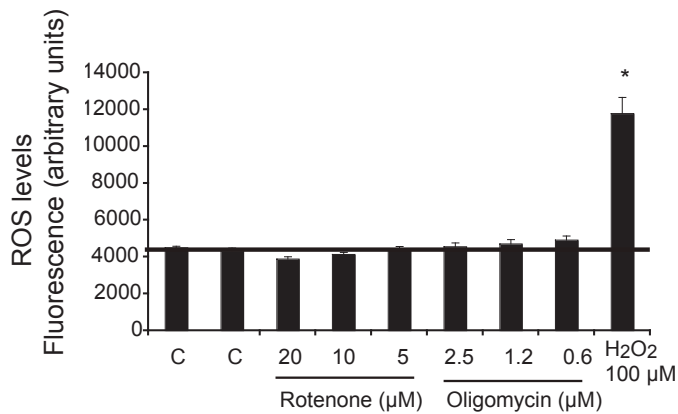

Supplement: pnas_0704482104_5.pdf [file pnas_0704482104_5.pdf]

**A**

NaF (5mM)

0 4 4 4.5 Time (hrs)

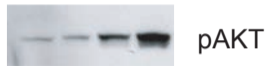

pAKT

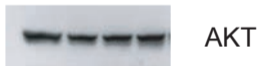

AKT

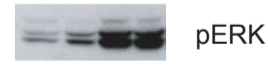

pERK

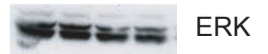

ERK

**B**

DMSO

0 15 30 45 60 120

Oligo 1 $\mu$ M

15 30 45 60 120 time (min)

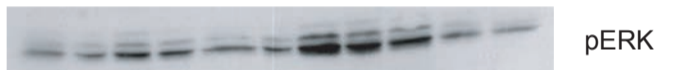

pERK

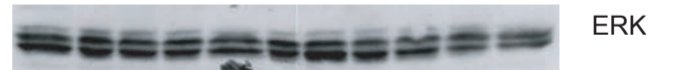

ERK

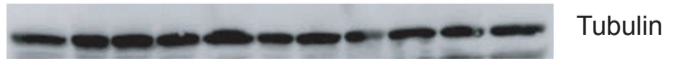

Tubulin

Supplement: pnas_0704482104_6.pdf [file pnas_0704482104_6.pdf]

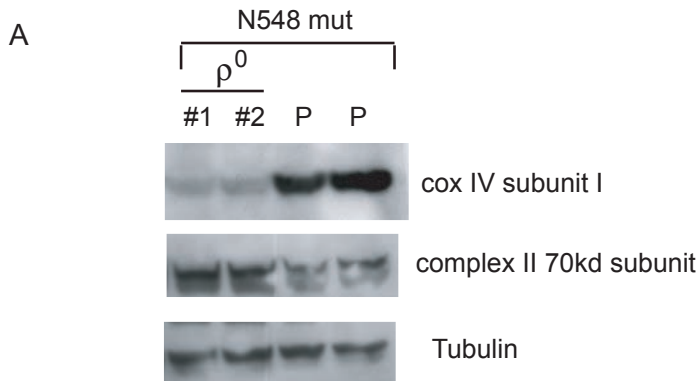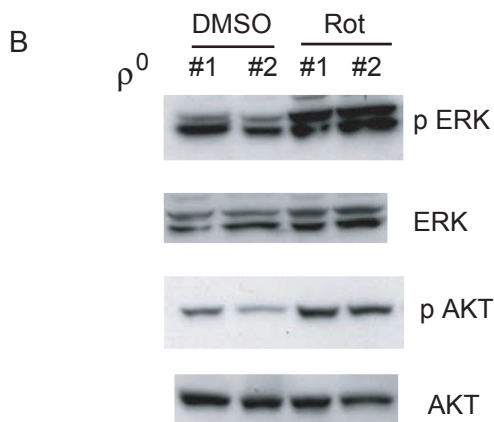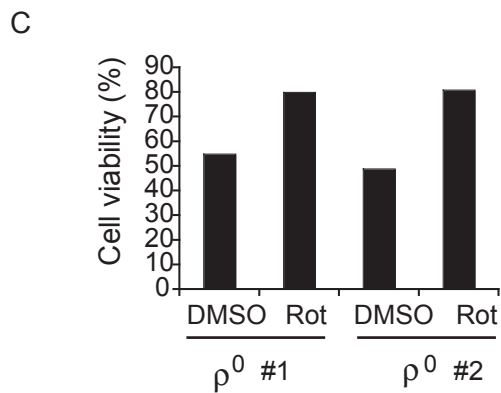

Supplement: pnas_0704482104_7.pdf [file pnas_0704482104_7.pdf]

AKT inhibitor VIII

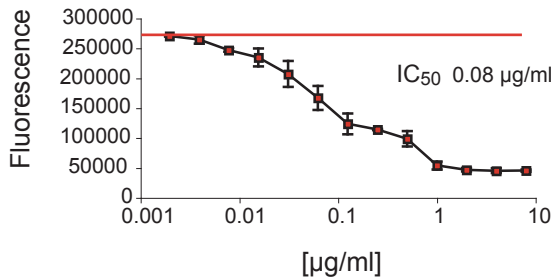

LY 294002

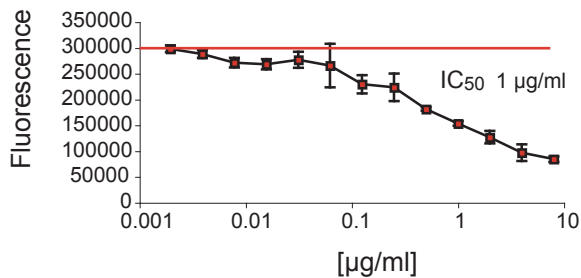

U 0126

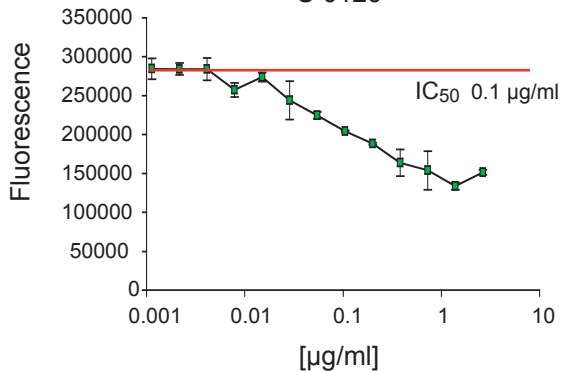

MEK 1

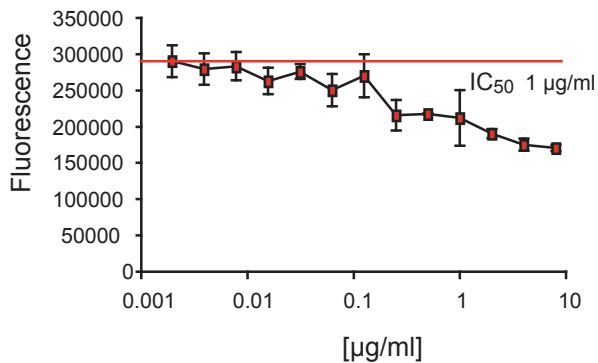

Supplement: pnas_0704482104_8.pdf [file pnas_0704482104_8.pdf]
